# Supplementary material for: Cytotoxic Activity and Chemical Composition of the Root Extract from the Mexican SpeciesLinum scabrellum: Mechanism of Action of the Active Compound 6-Methoxypodophyllotoxin
Source: Hindawi journal article supplement (doi:10.1155/2015/298463), 2015-01-01
Supplement: f1 [file 298463.f1.pdf]

# **Cytotoxic Activity and Chemical Composition of the Root Extracts from the Mexican Species *Linum scabrellum*: Mechanism of Action of the Active Compound 6-methoxypodophyllotoxin**

Ivonne Alejandre-García<sup>1</sup>, Laura Álvarez<sup>2</sup>, Alexandre Cardoso-Taketa<sup>1</sup>, Leticia González-Maya<sup>3</sup>, Mayra Antúnez<sup>2</sup>, Enrique Salas-Vidal<sup>4</sup>, Fernando Díaz<sup>5</sup>, Silvia Marquina-Bahena<sup>2\*</sup>, and María Luisa Villarreal<sup>1\*</sup>

<sup>1</sup> Centro de Investigación en Biotecnología. Universidad Autónoma del Estado de Morelos.

<sup>2</sup> Centro de Investigaciones Químicas. Universidad Autónoma del Estado de Morelos.

<sup>3</sup> Facultad de Farmacia. Universidad Autónoma del Estado de Morelos.

<sup>4</sup> Instituto de Biotecnología. Universidad Nacional Autónoma México.

<sup>5</sup> Centro de Investigaciones Biológicas. Madrid, Spain.

## **Supplementary Material**

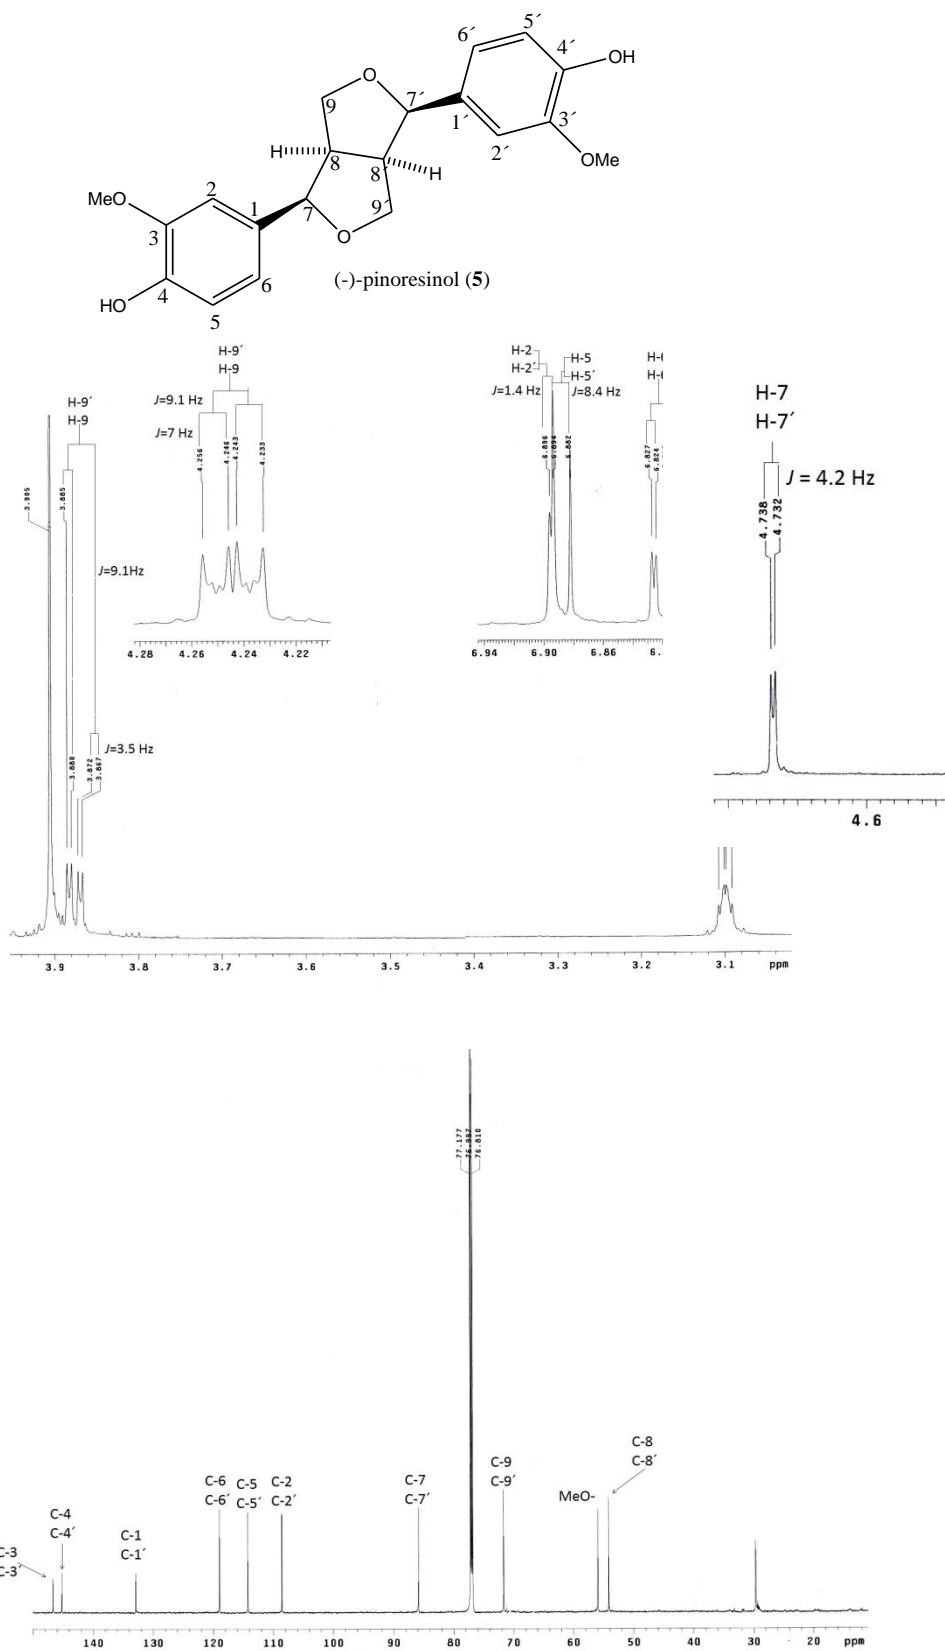

Figure 1.  $^1\text{H}$  NMR and  $^{13}\text{C}$  NMR spectra (400 and 100 MHz,  $\text{CDCl}_3$ ) of (-)- pinoresinol (**5**)

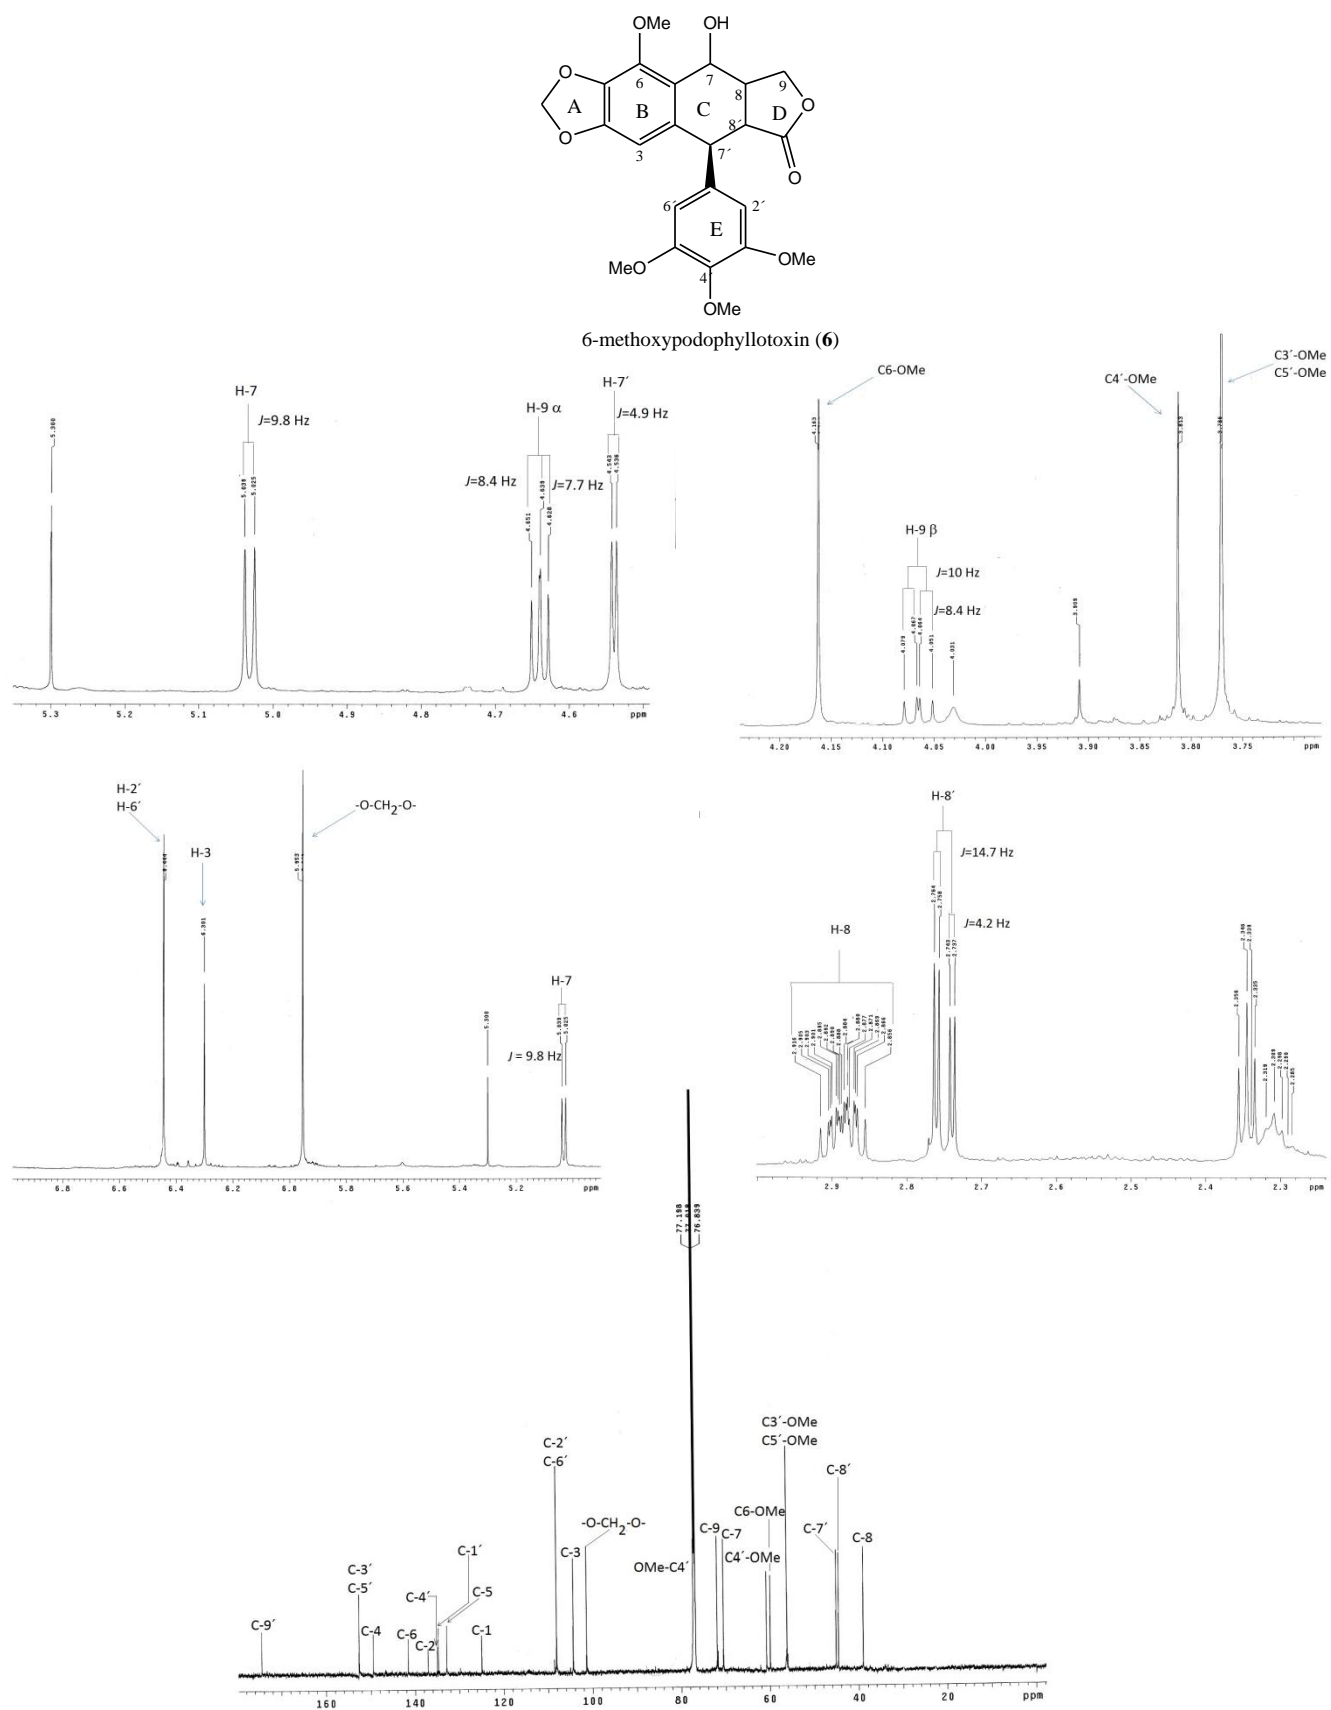

Figure 2.  $^1\text{H}$  NMR and  $^{13}\text{C}$  NMR spectra (400 and 100 MHz,  $\text{CDCl}_3$ ) of 6-methoxy podophyllotoxin (6)

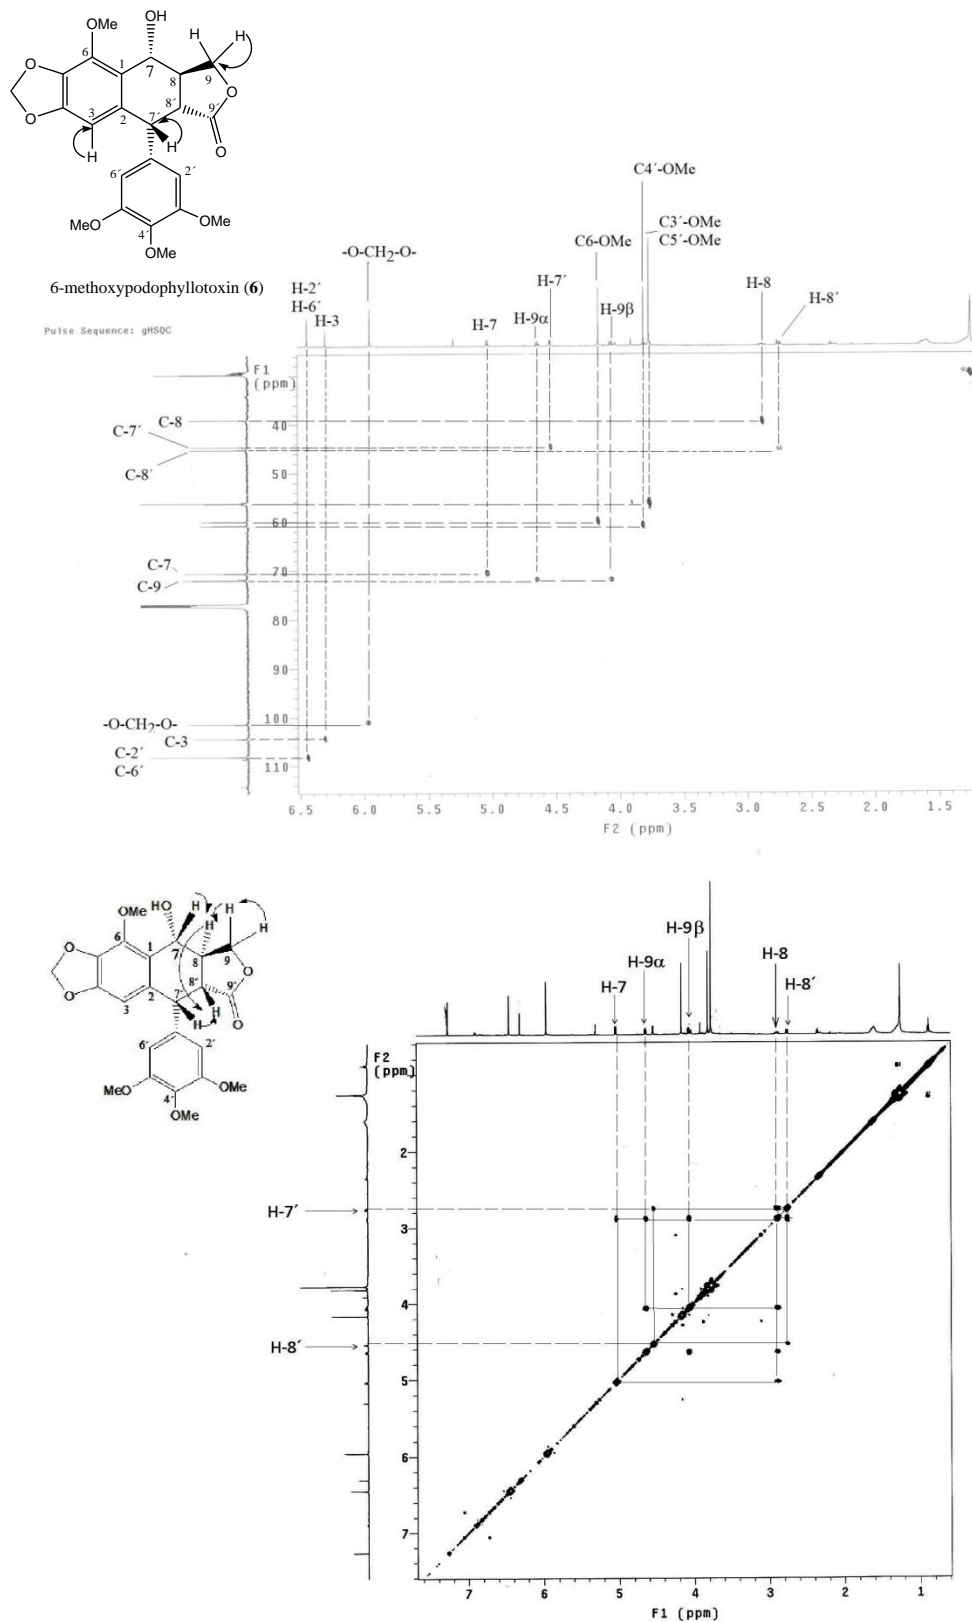

Figure 3 . HSQC and COSY spectra (400 MHz, CDCl<sub>3</sub>) of 6-methoxypodophyllotoxin (6)

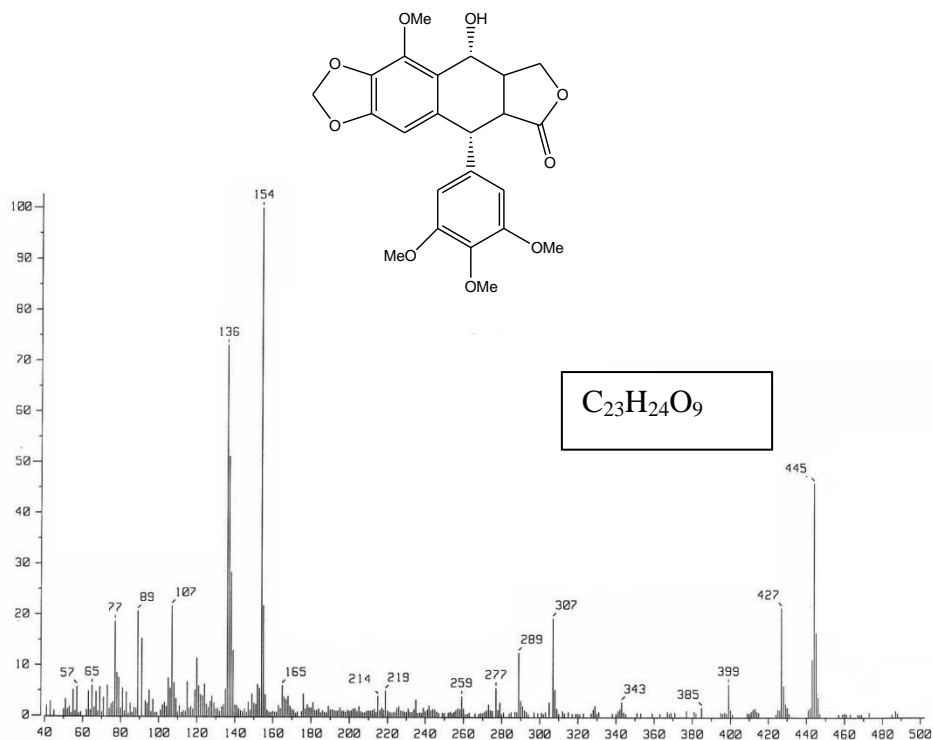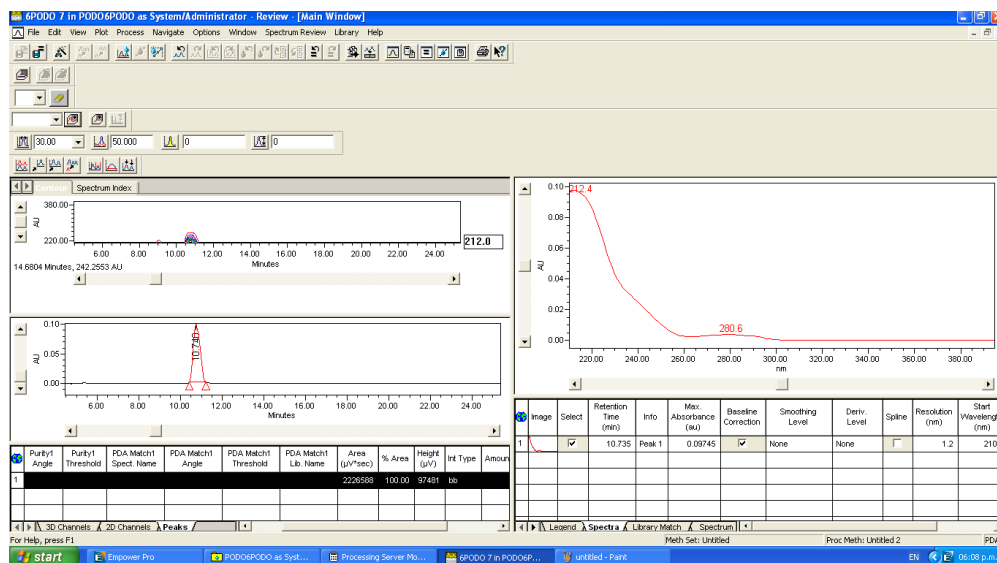

Figure 4. Positive FABMS and HPLC of 6-methoxypodophyllotoxin (**6**). 6-methoxypodophyllotoxin (**6**) was analyzed by high performance liquid chromatography, using a Waters 600 pump and Waters 2996 photodiode array detector. The analytical analysis was carried out with an isocratic solvent system (60% CH<sub>3</sub>CN, 40% H<sub>2</sub>O with 0.0125% TFA) through a Shiseido Capcell pak C18 column (4.6 mm I.D. x 250 mm, 5 µm), and a flow rate of 1 mL/min. An injection volume of 20 µL, three injections were performed for each sample.

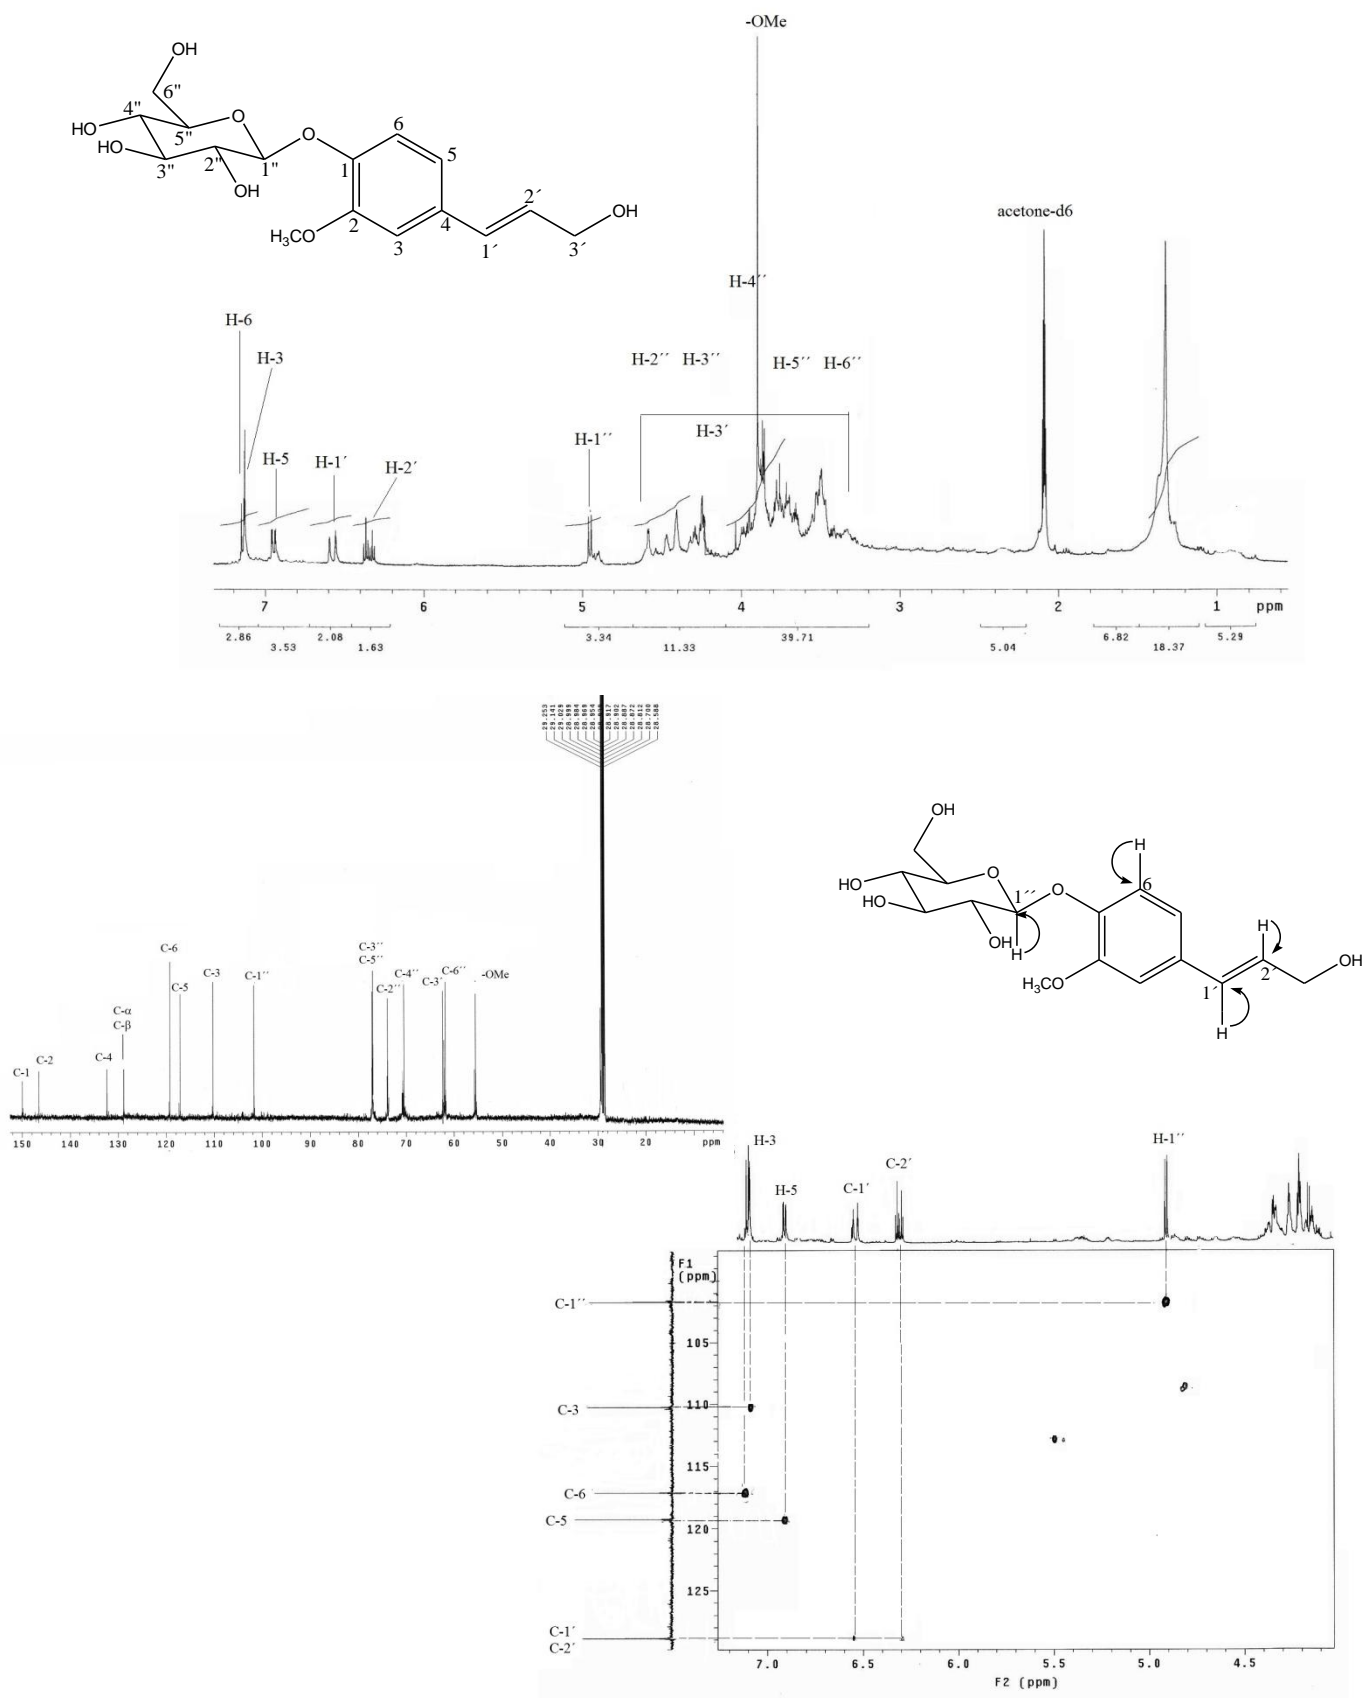

Figure 5.  $^1\text{H}$  NMR,  $^{13}\text{C}$  and HSQC NMR spectra (400 and 100 MHz, acetone- $d_6$ ) of coniferin (7)

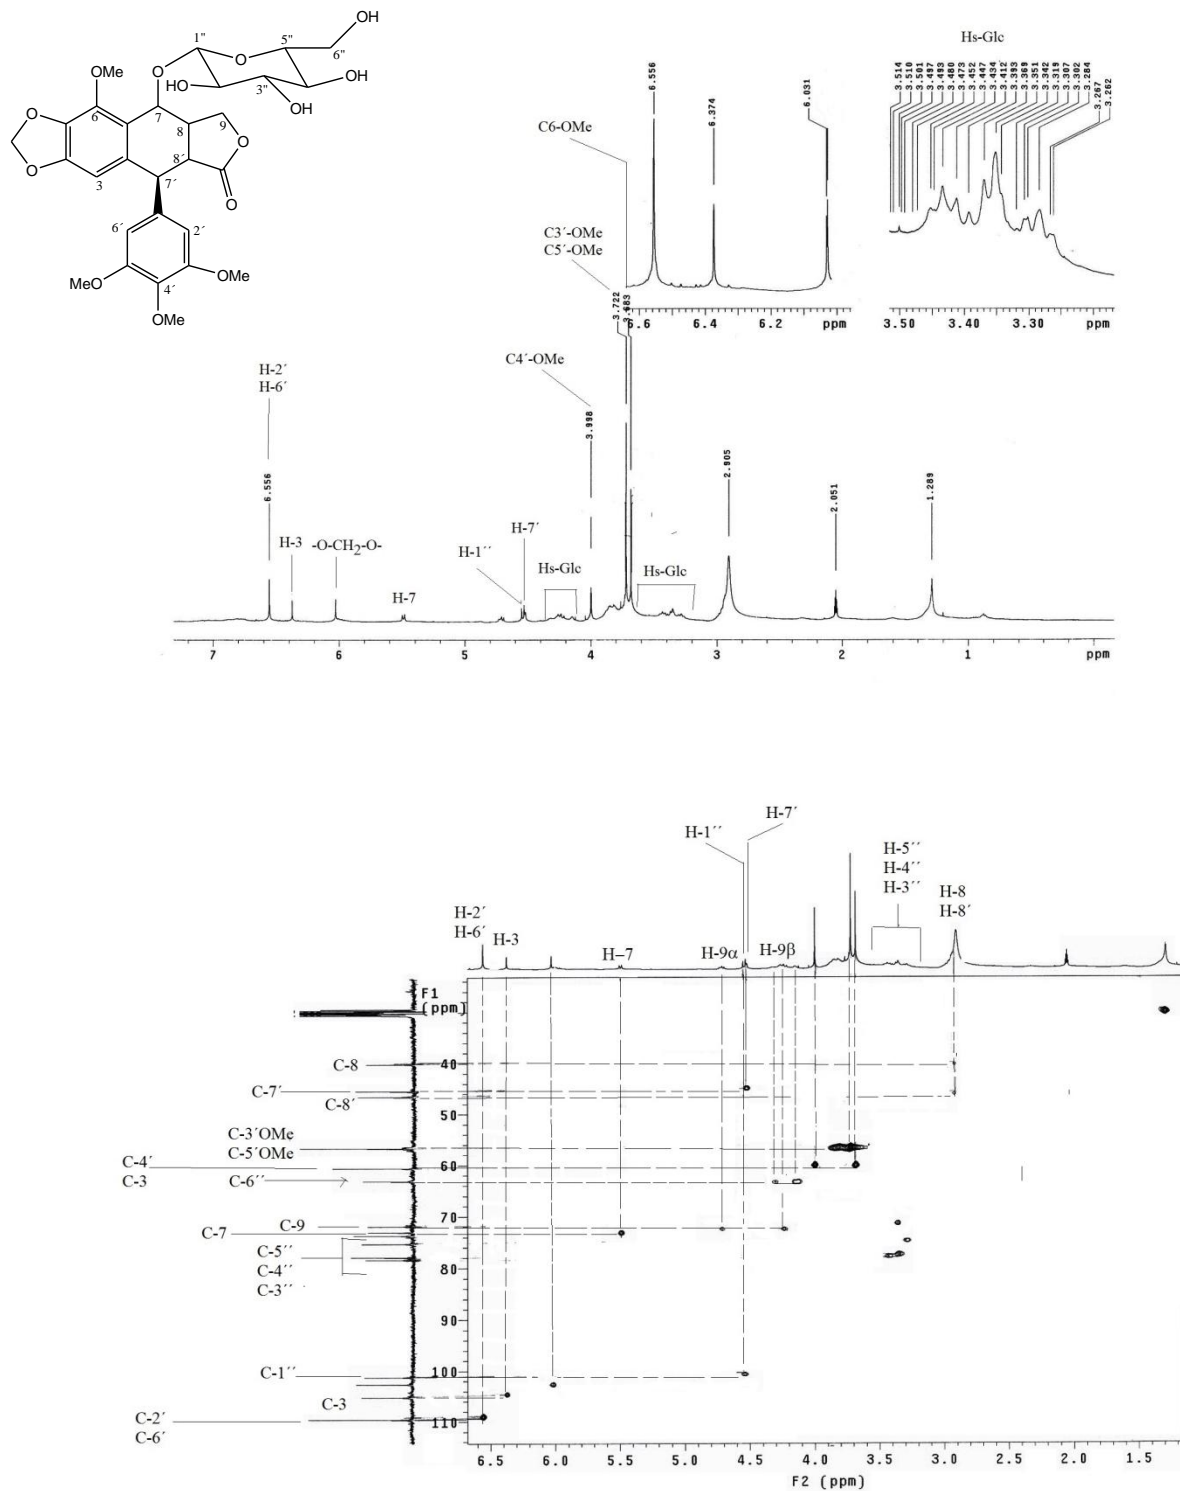

Figure 6. <sup>1</sup>H NMR and HSQC NMR spectra (400 and 100 MHz, acetone-d<sub>6</sub>) of 6-methoxypodophyllotoxin 7-O-β-D-glucopyranoside (**8**)
